# Supplementary material
Source: PubMed Central journal article supplement (PMC6450027)
Supplement: AEM.02826-18-s0001.pdf [file AEM.02826-18-s0001.pdf]

## **Supporting information**

### **Cryptic cycling of Fe(III)-organic matter complexes by phototrophic Fe(II)-oxidizing bacteria**

Chao Peng, Casey Bryce, Anneli Sundman, Andreas Kappler<sup>#</sup>

Geomicrobiology, Center for Applied Geosciences, University of Tuebingen,  
Tuebingen, Germany

<sup>#</sup>To whom correspondence should be sent:

Andreas Kappler, Geomicrobiology, Center for Applied Geosciences

University of Tuebingen, Sigwartstrasse 10, D-72076 Tuebingen, Germany

Phone: +49-7071-2974992, Fax: +49-7071-29-295059

Email: [andreas.kappler@uni-tuebingen.de](mailto:andreas.kappler@uni-tuebingen.de)

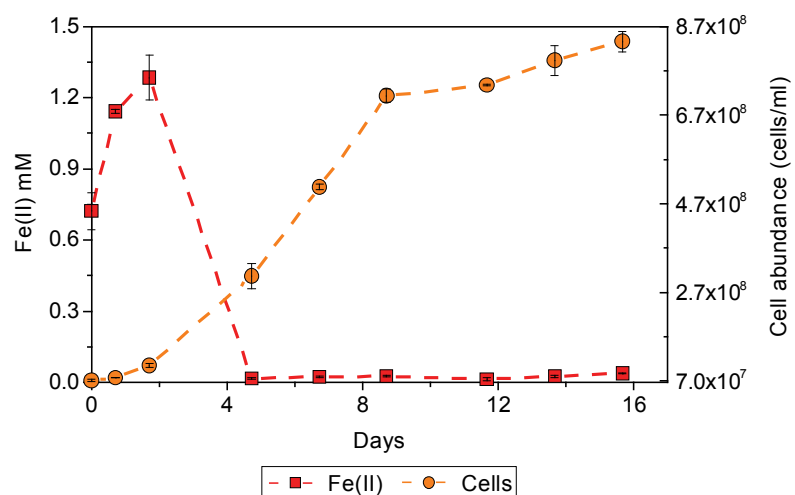

**Figure S1.** Fe(II) concentration and abundance of *R. ferrooxidans* SW2 cells in growth experiments (20°C, light incubation) using medium that initially contained both Fe(II) and Fe(III) (ca. 0.8 mM each) and 4 mM citrate.

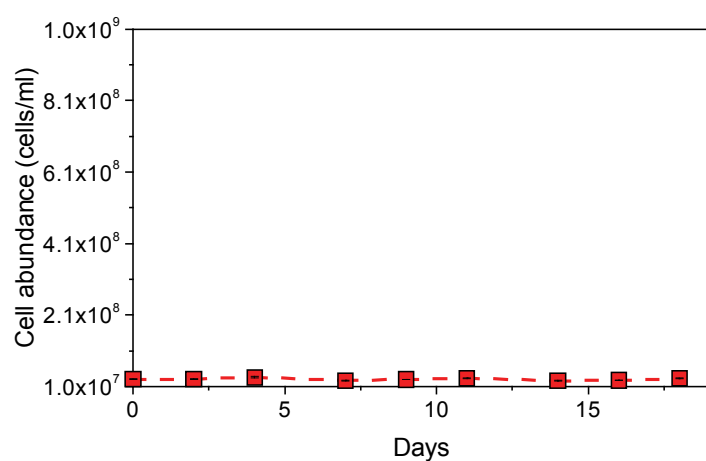

**Figure S2.** Cell abundance of *R. ferroxidans* SW2 during incubation with 1 mM acetone showing that there was no significant growth of *R. ferroxidans* SW2 on acetone.

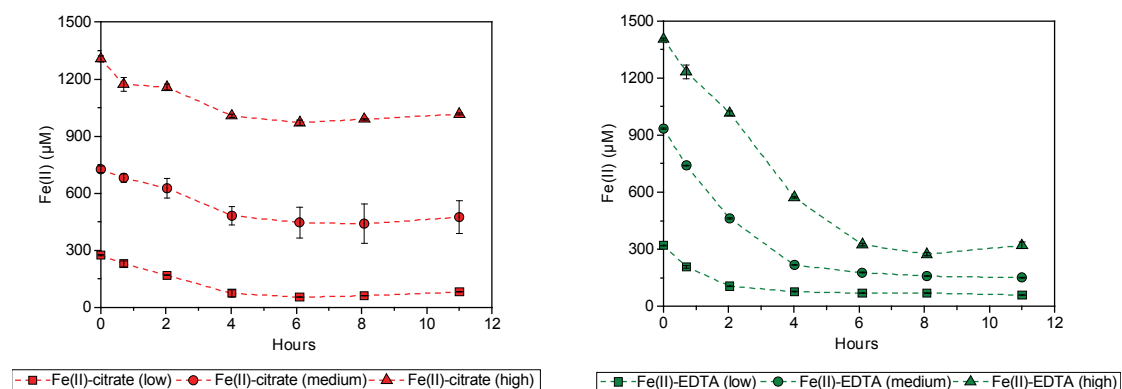

**Figure S3.** Oxidation of Fe(II)-citrate (left) and Fe(II)-EDTA (right) at three different Fe(II)-complex concentrations by *R. ferrooxidans* SW2 ( $1.4 \times 10^8$  cells/ml). The initial Fe(II) concentrations varied from ca. 300  $\mu\text{M}$  to 1300  $\mu\text{M}$ . The results are reported as an average and error bars indicate standard errors calculated from two independent parallels.

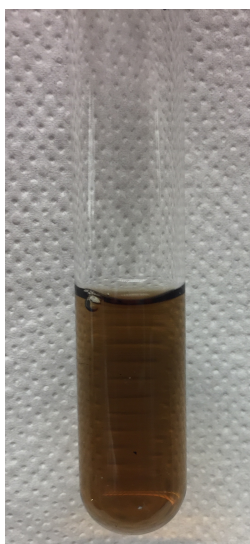

**Figure S4.** Fe(II)-PPHA complexes (0.1 mM Fe(II) and 0.2 mg/ml PPHA) in Hungate tubes. The PPHA has a dark color and absorbs light thus lowering the light intensity available for the phototrophic microorganisms.

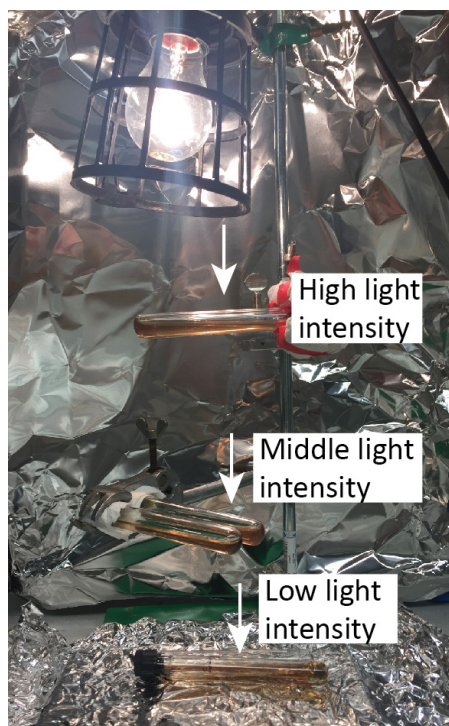

**Figure S5.** Photograph of an experiment to determine how light intensity influences the oxidation of Fe(II)-PPHA complexes by *R. ferrooxidans* SW2.

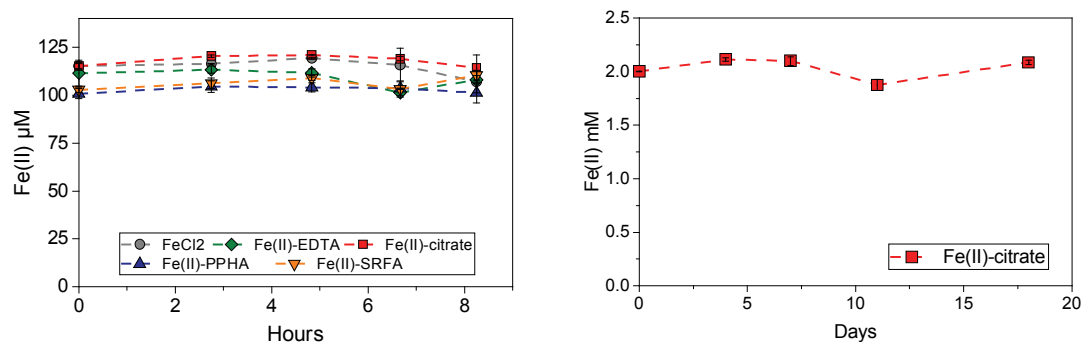

Figure S6. Abiotic controls with different Fe(II)-OM complexes (without *R. ferrooxidans* SW2 cells but incubated in the light). Error bars indicate standard errors calculated from two independent parallels. The result showed that there was no Fe(II) oxidation in the abiotic controls. Left: abiotic controls in cell suspension experiments with FeCl<sub>2</sub>, Fe(II)-EDTA, Fe(II)-citrate, Fe(II)-PPHA, and Fe(II)-SRFA. Right: abiotic control with Fe(II) citrate in a cell growth experiment.
